# Supplementary material
Source: PubMed Central journal article supplement (PMC6682819)
Supplement: CJN.00050119SupplementaryData.pdf [file CJN.00050119SupplementaryData.pdf]

## Supplementary Materials

1

2 **Appendix 1.** Search Strategy

3 **Appendix 2.** Data Abstraction Form

4 **Appendix 3.** Data Abstraction Form – Study Quality

5 **Supplemental Table 1.** Papers excluded after full text review

6 **Supplemental Table 2.** Overview of predictive variables by index

7 **Supplemental Table 3.** Predictive Variables and scoring of Included Indices

8 **Supplemental Figure 1.** Meta-Analysis by validation status

9 **Supplemental Figure 2.** Meta-Analysis by Cohort Size

10 **Supplemental Figure 3.** Meta-Analysis for cohorts >75 mean age

11

### 12 **Appendix 1 - Search Strategy**

13

14 Predict\*

15 Prognos\*

16 Surviv\*

17 Mortality

18 “functional outcomes”

19 comorbidity

20 Life expectancy

21 Score/index/indices

22 “c-statistic” / “c-index”/roc curve/

23 proportional hazards models/

24 cox proportional/cox regression

25 Risk prediction (rules)

26 Risk adjustment/

27 Risk assessment/stratification

28 Geriatric assessment/

29 Models\*

30 Likelihood

31 Severity of illness index

32 Vulnerable populations/

33 Frailty

34 Weight or overweight

35 Hazard ratio

36 Kaplan Meier/survival curve

1  
2 Both acute and chronic kidney failure.  
3 All years, all languages  
4 Adults  
5 esrd Thorsteinsdottir EMBASE  
6 1. exp \*renal replacement therapy/  
7 2. 1 and (death\* or mortality or surviv\*).mp. [mp=title, abstract, subject headings, heading word,  
8 drug trade name, original title, device manufacturer, drug manufacturer, device trade name,  
9 keyword]  
10 3. 2 and (predict\*.mp. or proportional hazards model/ or cox.mp. or "kaplan-meier".mp. or risk  
11 assessment/ or prognosis.mp.)  
12 4. exp case control study/ or exp case study/ or exp clinical article/ or exp clinical trial/ or exp  
13 longitudinal study/ or exp major clinical study/ or exp prospective study/ or exp retrospective  
14 study/  
15 5. exp cohort analysis/ or exp correlational study/ or exp cross-sectional study/  
16 6. 3 and (4 or 5)  
17 7. limit 6 to (adult <18 to 64 years> or aged <65+ years>)  
18 8. acute kidney failure/ or chronic kidney failure/ or end stage renal disease/  
19 9. acute kidney failure/th or chronic kidney failure/th or end stage renal disease/th  
20 10. (\*acute kidney failure/th or \*chronic kidney failure/th or \*end stage renal disease/th) and  
21 (death\* or mortality or surviv\*).mp. [mp=title, abstract, subject headings, heading word, drug  
22 trade name, original title, device manufacturer, drug manufacturer, device trade name, keyword]  
23 11. 10 and (risk assessment/ or predict\*.mp. or proportional hazards model/ or cox.mp. or  
24 "kaplan-meier".mp. or prognosis.mp.)  
25 12. 11 and (4 or 5)  
26 13. limit 12 to (adult <18 to 64 years> or aged <65+ years>)  
27 14. 7 or 13  
28 15. remove duplicates from 14  
29  
30    
31 esrd Thorsteinsdottir MEDLINE  
32 1. (ckd or esrd or eskd or "end stage renal" or "end stage kidney").mp. [mp=title, abstract,  
33 original title, name of substance word, subject heading word, keyword heading word, protocol  
34 supplementary concept word, rare disease supplementary concept word, unique identifier]  
35 2. exp renal insufficiency/co, mo, th, pc or kidney failure, chronic/co, th, pc, mo or kidney  
36 failure, acute/co, mo, th, pc

1 3. renal replacement therapy/ or renal dialysis/ or hemofiltration/  
2 4. (hemodialysis or haemodialysis or dialysis).mp. [mp=title, abstract, original title, name of  
3 substance word, subject heading word, keyword heading word, protocol supplementary concept  
4 word, rare disease supplementary concept word, unique identifier]  
5 5. or/1-4  
6 6. Vulnerable Populations/  
7 7. frail\*.mp. or frail elderly/ [mp=title, abstract, original title, name of substance word, subject  
8 heading word, keyword heading word, protocol supplementary concept word, rare disease  
9 supplementary concept word, unique identifier]  
10 8. 1 or (exp \*renal insufficiency/co, mo, th, pc or \*kidney failure, chronic/co, th, pc, mo or  
11 \*kidney failure, acute/co, mo, th, pc) or (\*renal replacement therapy/ or \*renal dialysis/ or  
12 \*hemofiltration/) or (hemodialysis or haemodialysis or dialysis).tw.  
13 9. (6 or 7) and (mo.fs. or mortality.mp. or death\*.mp. or surviv\*.mp. or life expectancy/)  
14 [mp=title, abstract, original title, name of substance word, subject heading word, keyword  
15 heading word, protocol supplementary concept word, rare disease supplementary concept word,  
16 unique identifier]  
17 10. 9 and predict\*.mp. [mp=title, abstract, original title, name of substance word, subject heading  
18 word, keyword heading word, protocol supplementary concept word, rare disease supplementary  
19 concept word, unique identifier]  
20 11. 9 and ("c statistic" or "c index" or score or index or indices or roc).mp. [mp=title, abstract,  
21 original title, name of substance word, subject heading word, keyword heading word, protocol  
22 supplementary concept word, rare disease supplementary concept word, unique identifier]  
23 12. 10 or 11  
24 13. 12 and (predict\* or prognos\* or risk\*).mp. [mp=title, abstract, original title, name of  
25 substance word, subject heading word, keyword heading word, protocol supplementary concept  
26 word, rare disease supplementary concept word, unique identifier]  
27 14. 8 and (mo.fs. or mortality.mp. or death\*.mp. or surviv\*.mp. or life expectancy/) [mp=title,  
28 abstract, original title, name of substance word, subject heading word, keyword heading word,  
29 protocol supplementary concept word, rare disease supplementary concept word, unique  
30 identifier]  
31 15. 14 and predict\*.mp. [mp=title, abstract, original title, name of substance word, subject  
32 heading word, keyword heading word, protocol supplementary concept word, rare disease  
33 supplementary concept word, unique identifier]  
34 16. 14 and ("c statistic" or "c index" or score or index or indices or roc or cox or rule\* or adjust\*  
35 or stratif\*).mp. [mp=title, abstract, original title, name of substance word, subject heading word,

1 keyword heading word, protocol supplementary concept word, rare disease supplementary  
2 concept word, unique identifier]  
3 17. 14 and (model\* or ratio or prognos\*).mp. [mp=title, abstract, original title, name of substance  
4 word, subject heading word, keyword heading word, protocol supplementary concept word, rare  
5 disease supplementary concept word, unique identifier]  
6 18. 15 and (16 or 17)  
7 19. 18 and (cohort\* or prospective\* or series or population\* or retrospective\*).mp. [mp=title,  
8 abstract, original title, name of substance word, subject heading word, keyword heading word,  
9 protocol supplementary concept word, rare disease supplementary concept word, unique  
10 identifier]  
11 20. limit 18 to (clinical trial, all or clinical trial, phase i or clinical trial, phase ii or clinical trial,  
12 phase iii or clinical trial, phase iv or clinical trial or comparative study or controlled clinical trial  
13 or evaluation studies or meta analysis or multicenter study or observational study or pragmatic  
14 clinical trial or randomized controlled trial or "review" or systematic reviews or validation  
15 studies)  
16 21. 19 or 20  
17 22. limit 21 to ("young adult (19 to 24 years)" or "adult (19 to 44 years)" or "young adult and  
18 adult (19-24 and 19-44)" or "middle age (45 to 64 years)" or "middle aged (45 plus years)" or  
19 "all aged (65 and over)" or "aged (80 and over)")  
20 23. 21 and (adult\* or "middle age\*" or elder\* or older\* or men or women).mp. [mp=title,  
21 abstract, original title, name of substance word, subject heading word, keyword heading word,  
22 protocol supplementary concept word, rare disease supplementary concept word, unique  
23 identifier]  
24 24. 22 or 23  
25  
26

1 **Appendix 2 - ESRD Prognostication Data Abstraction**

2  
3 **Study Information**

4 Date reviewed: Reviewer:  
5 First Author: Year Published: Language:  
6 Title:

7 **Please circle one:**

8 Country / International Single-center / Multi-center  
9 AKI ESRD  
10 ICU Hospital Outpatient All  
11 CRRT Intermittent HD Peritoneal dialysis All

12  
13 **Please describe the following:**

14 Study Design \_\_\_\_\_  
15 Predictive Modelling YES / NO  
16 \_\_\_\_\_  
17 Validation Cohort YES / NO \_\_\_\_\_  
18 Length of Follow Up/Prognostication \_\_\_\_\_

19  
20 Include? YES NO

21 Exclusion criteria

22  
23  
24  
25  
26  
27  
28  
29  
30 **Development Cohort**

31  
32 N Age mean Age SD  
33 Female (%) 44%  
34  
35 Distribution of race: White (%) Black (%) Hispanic (%)  
36 Other (%)  
37

38 Factors included in model and average values (comorbidities, indices, demographics,  
39 etc.):  
40  
41  
42  
43  
44  
45  
46

1  
2  
3  
4  
5  
6  
7  
8  
9  
10  
11  
12  
13  
14  
15  
16  
17  
18  
19  
20  
21  
22  
23  
24  
25  
26  
27  
28  
29  
30  
31  
32  
33  
34  
35  
36  
37  
38  
39  
40  
41

Dialysis type: hemodialysis                  peritoneal                  home

Access type: catheter                  AV                  other                  not specified

**Validation Cohort**

N                                  Age mean                                  Age SD

Female (%)

Distribution of race: White (%)                                  Black (%)                                  Hispanic (%)

Other (%)

Factors included in model and average values (comorbidities, indices, demographics, etc.):

Dialysis type: hemodialysis                  peritoneal                  home

Access type: catheter                  AV                  other

**Outcomes**

|             | Development Group | Validation Group |
|-------------|-------------------|------------------|
| N           |                   |                  |
| C-statistic |                   |                  |
| CI          |                   |                  |

|                               |  |  |
|-------------------------------|--|--|
| Observed mortality (ppy)      |  |  |
| SD                            |  |  |
| Observed mortality (HR/OR/RR) |  |  |
| CI                            |  |  |
| Predicted mortality           |  |  |
| SD                            |  |  |
| Hospitalizations (ppy)        |  |  |
| SD                            |  |  |
| Hospitalization LOS (mean)    |  |  |
| SD                            |  |  |
| Readmissions (mean)           |  |  |
| SD                            |  |  |

1  
2  
3  
4  
5  
6  
7  
8  
9  
10  
11  
12  
13  
14  
15  
16  
17

**Quality of Prediction Model**

|                                          |            |                         |
|------------------------------------------|------------|-------------------------|
| Sample Participation Described?          | <b>YES</b> | INCOMPLETE (why?)       |
| Prognostic Variables Defined?            | <b>YES</b> | INCOMPLETE (why?)       |
| Blinded Measurement?                     | <b>YES</b> | INCOMPLETE (why?) N/A   |
| Potential Predictors Completed (%) _____ |            |                         |
| Mortality Outcome Complete (%) _____     |            |                         |
| Conceptual Model Stability Tested?       | <b>YES</b> | <b>PARTLY</b> <b>NO</b> |

**Appendix 3 - ESRD Prognostication Quality Score Data Abstraction**

|  | <b>Study Participation</b> | <b>Study Attrition</b> | <b>Prognostic factor measurement</b> | <b>Outcome measurement</b> | <b>Confounding measurement and account</b> | <b>Analysis</b> |
|--|----------------------------|------------------------|--------------------------------------|----------------------------|--------------------------------------------|-----------------|
|  |                            |                        |                                      |                            |                                            |                 |
|  |                            |                        |                                      |                            |                                            |                 |
|  |                            |                        |                                      |                            |                                            |                 |
|  |                            |                        |                                      |                            |                                            |                 |







1 **Supplemental Table 1.** Papers excluded after full text review

| Year | Journal                                       | First Author | Title                                                                                                                                                                                                                       |
|------|-----------------------------------------------|--------------|-----------------------------------------------------------------------------------------------------------------------------------------------------------------------------------------------------------------------------|
| 2004 | Kidney International                          | Abbott       | Body mass index, dialysis modality, and survival: Analysis of the States Renal Data System Dialysis Morbidity and Mortality Wave                                                                                            |
| 2010 | Peritoneal Dialysis International             | Abraham      | Predictors of long-term survival on peritoneal dialysis in South I multicenter study                                                                                                                                        |
| 2008 | American Journal of Nephrology                | Agarwal      | Competing risk factor analysis of end-stage renal disease and m chronic kidney disease                                                                                                                                      |
| 2007 | CJASN                                         | Ajiro        | Mortality predictors after 10 years of dialysis: a prospective stud Japanese hemodialysis patients                                                                                                                          |
| 2010 | Arquivos Brasileiros de Cardiologia           | Almeida      | Global and cardiovascular mortality and risk factors in patients u hemodialysis treatment. [Spanish, English, Portuguese]                                                                                                   |
| 1994 | American Journal of Kidney Diseases           | Avram        | Predictors of survival in continuous ambulatory peritoneal dialy the importance of prealbumin and other nutritional and metabo                                                                                              |
| 1995 | American Journal of Kidney Diseases           | Avram        | Markers for survival in dialysis: a seven-year prospective study                                                                                                                                                            |
| 1995 | Journal of the American Society of Nephrology | Avram        | PREDICTORS OF MORTALITY IN HEMODIALYSIS (HD) - AN 8 YEAR PROSPECTIVE-STUDY                                                                                                                                                  |
| 1996 | Peritoneal Dialysis International             | Avram        | Predictors of survival in continuous ambulatory peritoneal dialy a five-year prospective study                                                                                                                              |
| 2001 | American Journal of Kidney Diseases           | Avram        | Survival on hemodialysis and peritoneal dialysis over 12 years w emphasis on nutritional parameters                                                                                                                         |
| 2000 | American Journal of Kidney Diseases           | Becker       | Using renal transplantation to evaluate a simple approach for p the impact of end-stage renal disease therapies on patient survi observed/expected life span                                                                |
| 2000 | American Journal of Medicine                  | Beddhu       | A simple comorbidity scale predicts clinical outcomes and costs patients                                                                                                                                                    |
| 1998 | Journal of Renal Nutrition                    | Beto         | Using the hemodialysis prognostic nutrition index and urea redu to predict morbidity and mortality: a pilot study of the 1995 cou renal nutrition national research question.[Erratum appears in 1 Jul;8(3):170]            |
| 1999 | Journal of Renal Nutrition                    | Beto         | Hemodialysis prognostic nutrition index as a predictor for morbi mortality in hemodialysis patients and its correlation to adequa dialysis. Council on Renal Nutrition National Research Question Collaborative Study Group |
| 2007 | Renal Failure                                 | Biesenbach   | Different risk factors and causes for early death after initiating o diabetic and non-diabetic patients                                                                                                                     |
| 2008 | Nephrology                                    | Bilgic       | Predictors for quality of life in continuous ambulatory peritonea patients                                                                                                                                                  |
| 2007 | CJASN                                         | Bradbury     | Predictors of early mortality among incident US hemodialysis pa the Dialysis Outcomes and Practice Patterns Study (DOPPS)                                                                                                   |
| 2014 | BMC Nephrology                                | Browne       | Analysis of factors predicting mortality of new patients commen replacement therapy 10 years of follow-up                                                                                                                   |
| 2001 | Nefrologia                                    | Caravaca     | [Predictors of early death during dialysis]                                                                                                                                                                                 |

|      |                                                       |                     |                                                                                                                                     |
|------|-------------------------------------------------------|---------------------|-------------------------------------------------------------------------------------------------------------------------------------|
| 2008 | Dialisis y Trasplante                                 | Carreras            | The malnutrition-inflammation score as a mortality predictor in patients on hemodialysis. [Spanish]                                 |
| 2011 | Nephron                                               | Chae                | Prediction of mortality in patients undergoing maintenance hemodialysis using the Charlson Comorbidity Index using ICD-10 database  |
| 2014 | CJASN                                                 | Chen                | A comorbidity index for mortality prediction in Chinese patients receiving hemodialysis                                             |
| 2009 | Q J Med                                               | Cherkuri            | Analysis of risk factors for mortality of incident patients commencing hemodialysis in East Yorkshire, UK                           |
| 2014 | Blood Purification                                    | Chua                | Predicting first-year mortality in incident dialysis patients with end-stage renal disease-The UREA5 study                          |
| 2009 | Blood Purification                                    | Chung               | Impact of incremental risk factors on peritoneal dialysis patient mortality: proposal of a simplified clinical mortality risk score |
| 2010 | CJASN                                                 | Cohen               | Predicting six-month mortality for patients who are on maintenance hemodialysis                                                     |
| 2009 | Nephrology Dialysis Transplantation                   | Conway              | Predicting mortality and uptake of renal replacement therapy in patients with stage 4 chronic kidney disease                        |
| 1991 | Psychological Medicine                                | Craven              | The Endstage Renal Disease Severity Index (ESRD-SI)                                                                                 |
| 1995 | Nephrology Dialysis Transplantation                   | De Lima             | Predictors of mortality in long-term haemodialysis patients with a high prevalence of comorbid conditions                           |
| 1990 | Journal of Nervous and Mental Disease                 | Devins              | Psychosocial predictors of survival in end-stage renal disease                                                                      |
| 1999 | Nefrologia                                            | Diaz Corte          | Factors predicting survival during replacement therapy for end-stage renal disease. [Spanish]                                       |
| 2013 | American Journal of Geriatric Psychiatry              | Feng                | Depressive symptoms in older adults with chronic kidney disease: Mortality, quality of life outcomes, and correlates                |
| 2009 | West Indian Medical Journal                           | Gayle               | Quality of life in end stage renal disease: a multicentre comparative study                                                         |
| 1995 | Nephrology Dialysis Transplantation                   | Genestier           | Prognostic factors in CAPD patients: A retrospective study of a 10-year period                                                      |
| 2010 | Peritoneal Dialysis International                     | Genestier           | Prognostic survival factors in elderly renal failure patients treated with peritoneal dialysis: a nine-year retrospective study     |
| 2011 | Collegium Antropologicum                              | Germin-Petrovic     | Health-related quality of life in the patients on maintenance hemodialysis: the analysis of demographic and clinical factors        |
| 2010 | Nephrology Dialysis Transplantation                   | Goldfarb-Rumyantzev | Association between social adaptability index and survival of patients with chronic kidney disease                                  |
| 2005 | Polskie Archiwum Medycyny Wewnętrznej                 | Grzegorzewska       | [Which factors determine survival of patients on regular dialysis treatment?]                                                       |
| 2013 | Journal of the American Medical Directors Association | Hall                | End-stage renal disease in nursing homes: a systematic review                                                                       |
| 2009 | BMC Nephrology                                        | Han                 | Quality of life and mortality from a nephrologist's view: a prospective observational study                                         |
| 2013 | Nephrology                                            | Huang               | Performance of the Framingham risk score in patients receiving maintenance hemodialysis                                             |
| 2013 | Palliative Medicine                                   | Hussain             | Comparison of survival analysis and palliative care involvement in end-stage renal disease                                          |

|      |                                                |                |                                                                                                                                                                                             |
|------|------------------------------------------------|----------------|---------------------------------------------------------------------------------------------------------------------------------------------------------------------------------------------|
|      |                                                |                | aged over 70 years choosing conservative management or renal replacement therapy in advanced chronic kidney disease                                                                         |
| 1982 | Annals of Internal Medicine                    | Hutchinson     | Predicting survival in adults with end-stage renal disease: an age equivalence index                                                                                                        |
| 1998 | American Journal of Nephrology                 | Ifudu          | Predictive value of functional status for mortality in patients on maintenance hemodialysis                                                                                                 |
| 2013 | International Urology & Nephrology             | Ignjatovic     | Endothelial dysfunction, inflammation and malnutrition markers: predictors of mortality in dialysis patients: multimarker approach                                                          |
| 1994 | Nephron                                        | Iseki          | Effect of renal diseases and comorbid conditions on survival in dialysis patients                                                                                                           |
| 2012 | CJASN                                          | Joyce          | Health-related quality of life as a predictor of mortality among stage 5 AKI                                                                                                                |
| 2001 | American Journal of Kidney Diseases            | Kalantar-Zadeh | A malnutrition-inflammation score is correlated with morbidity and mortality in maintenance hemodialysis patients                                                                           |
| 2010 | Journal of Nephrology                          | Kao            | Life expectancy, expected years of life lost and survival of hemodialysis and peritoneal dialysis patients                                                                                  |
| 2012 | Renal Failure                                  | Kim do         | Factors influencing survival according to elapsed time in peritoneal dialysis patients                                                                                                      |
| 2000 | Kidney International                           | Kimmel         | Multiple measurements of depression predict mortality in a long-term study of chronic hemodialysis outpatients                                                                              |
| 1998 | Scandinavian Journal of Urology and Nephrology | Klefter        | Risk factors in haemodialysis patients: Evaluation of commonly used variables on death rate                                                                                                 |
| 2003 | Kidney International                           | Knight         | The association between mental health, physical function, and hemodialysis mortality                                                                                                        |
| 1993 | Diabetologia                                   | Koch           | Survival and predictors of death in dialysed diabetic patients                                                                                                                              |
| 2010 | Clinical Nephrology                            | Kumar          | Significance of self-reported sleep quality (SQ) in chronic kidney disease (CKD): the Renal Research Institute (RRI)-CKD study                                                              |
| 1997 | Revista de Investigacion Clinica               | Leanos-Miranda | Factors predicting survival in patients on peritoneal dialysis. [Spanish]                                                                                                                   |
| 2011 | Journal of Renal Nutrition                     | Leinig         | Predictive value of malnutrition markers for mortality in peritoneal dialysis patients                                                                                                      |
| 2010 | Kidney International                           | Liu            | An improved comorbidity index for outcome analyses among dialysis patients                                                                                                                  |
| 2003 | American Journal of Kidney Diseases            | Lopes          | Health-related quality of life and associated outcomes among hemodialysis patients of different ethnicities in the United States: the Dialysis Outcomes and Practice Patterns Study (DOPPS) |
| 2010 | Journal of Renal Nutrition                     | Lopes          | Independent and Joint Associations of Nutritional Status Indicators with Mortality Risk Among Chronic Hemodialysis Patients in the Dialysis Outcomes and Practice Patterns Study (DOPPS)    |
| 1998 | Nefrologia                                     | Lou            | Risk factors for mortality in long term hemodialysis. [Spanish]                                                                                                                             |
| 1990 | American Journal of Kidney Diseases            | Lowrie         | Death risk in hemodialysis patients: the predictive value of commonly measured variables and an evaluation of death rate differences between facilities                                     |
| 2003 | American Journal of                            | Lowrie         | Medical outcomes study short form-36: a consistent and powerful                                                                                                                             |

|      |                                                 |            |                                                                                                                                                                 |
|------|-------------------------------------------------|------------|-----------------------------------------------------------------------------------------------------------------------------------------------------------------|
|      | Kidney Diseases                                 |            | predictor of morbidity and mortality in dialysis patients                                                                                                       |
| 2012 | American Journal of Nephrology                  | Lukowsky   | Patterns and predictors of early mortality in incident hemodialysis: new insights                                                                               |
| 2012 | International Urology & Nephrology              | Madziarska | Elderly dialysis patients: Analysis of factors affecting long-term survival: a 5-year prospective observation                                                   |
| 2005 | Kidney International                            | Mallamaci  | Prognostic value of combined use of biomarkers of inflammation, endothelial dysfunction, and myocardial pathology in patients with ESRD                         |
| 2009 | Japanese Journal of Nephrology                  | Matsuo     | [Risk factors for death in patients starting PD for their first renal replacement therapy]                                                                      |
| 2008 | Acta Diabetologica                              | Mauri      | Development of a predictive model for early death in diabetic patients entering hemodialysis: a population-based study                                          |
| 2003 | American Journal of Kidney Diseases             | Miskulin   | Comorbidity and its change predict survival in incident dialysis patients                                                                                       |
| 2004 | Nephrology Dialysis Transplantation             | Miskulin   | Predicting 1 year mortality in an outpatient haemodialysis population: comparison of comorbidity instruments                                                    |
| 2005 | Revista Da Associacao Medica Brasileira         | Morsch     | [Renal disease severity index, clinical indicators and mortality of incident hemodialysis]                                                                      |
| 2013 | Nephrology Dialysis Transplantation             | Ng         | Progression in comorbidity before hemodialysis initiation is a valuable predictor of survival in incident patients                                              |
| 2011 | American Journal of Kidney Diseases             | Nitsch     | CKD and hospitalization in the elderly: a community-based cohort study in the United Kingdom                                                                    |
| 1999 | Advances in Peritoneal Dialysis                 | Ohashi     | Predictors of survival in continuous ambulatory peritoneal dialysis: the importance of left ventricular hypertrophy and diabetic nephropathy                    |
| 2002 | Nephrology                                      | Okada      | Predialysis factors related to prognosis in type 2 diabetic patients on chronic dialysis in Japan                                                               |
| 2013 | Journal of Nephrology                           | Oliva      | Survival and factors predicting mortality in hemodialysis patients aged 75 years old                                                                            |
| 2012 | Health & Quality of Life Outcomes               | Osthus     | Mortality and health-related quality of life in prevalent dialysis patients: Comparison between 12-items and 36-items short-form health-related quality of life |
| 1989 | Advances in Peritoneal dialysis                 | Panarello  | Dialysis for the elderly: survival and risk factors                                                                                                             |
| 2014 | Journal of Nephrology                           | Panichi    | Geriatric nutritional risk index is a strong predictor of mortality in incident hemodialysis patients: Data from the Riscavid cohort                            |
| 2000 | Health Care Financing Review                    | Parkerson  | Health-related quality of life predictors of survival and hospital utilization in incident hemodialysis patients                                                |
| 2005 | American Journal of Kidney Diseases             | Perlman    | Quality of life in chronic kidney disease (CKD): A cross-sectional study from the renal research institute - CKD study                                          |
| 1991 | International Journal of Psychiatry in Medicine | Peterson   | Depression, perception of illness and mortality in patients with end-stage renal disease                                                                        |
| 2002 | Kidney International                            | Pifer      | Mortality risk in hemodialysis patients and changes in nutritional status: DOPPS                                                                                |
| 2009 | Nephrology Dialysis Transplantation             | Pizzarelli | Predictivity of survival according to different equations for estimating glomerular function in community-dwelling elderly subjects                             |
| 2002 | Journal of the American Society of Nephrology   | Qureshi    | Inflammation, malnutrition, and cardiac disease as predictors of mortality in hemodialysis patients                                                             |

|      |                                                                                                 |                    |                                                                                                                                                                             |
|------|-------------------------------------------------------------------------------------------------|--------------------|-----------------------------------------------------------------------------------------------------------------------------------------------------------------------------|
| 2009 | American Journal of Kidney Diseases                                                             | Rambod             | Association of Malnutrition-Inflammation Score with quality of life and mortality in hemodialysis patients: a 5-year prospective cohort study                               |
| 2012 | International Urology & Nephrology                                                              | Rattanasompattikul | Charlson comorbidity score is a strong predictor of mortality in hemodialysis patients                                                                                      |
| 1993 | Journal of the American Society of Nephrology                                                   | Rocco              | The efficacy number as a predictor of morbidity and mortality in dialysis patients                                                                                          |
| 2002 | Peritoneal Dialysis International                                                               | Rocco              | Risk factors for early mortality in U.S. peritoneal dialysis patients: residual renal function                                                                              |
| 2006 | Disease Management                                                                              | Sands              | Predicting hospitalization and mortality in end-stage renal disease patients using an Index of Coexisting Disease (ICED)-based risk score model                             |
| 2009 | Nephrology Dialysis Transplantation                                                             | Seica              | Factors affecting the quality of life of haemodialysis patients from a multicentric study                                                                                   |
| 2014 | PLoS ONE                                                                                        | Seidel             | Physical, Cognitive and Emotional Factors Contributing to Quality of Life, Functional Health and Participation in Community Dwelling in Chronic Kidney Disease              |
| 2006 | Makedonska Akademija na Naukite i Umetnostite Oddelenie Za Bioloski i Meditsinski Nauki Prilozi | Selim              | Inflammation predicts all-cause and cardiovascular mortality in haemodialysis patients                                                                                      |
| 2010 | Renal Failure                                                                                   | Senol              | Important determinants of quality of life in a peritoneal dialysis patients in Turkey                                                                                       |
| 2010 | British Journal of General Practice                                                             | Sharma             | Does stage-3 chronic kidney disease matter? A systematic literature review                                                                                                  |
| 2011 | Nephrology Dialysis Transplantation                                                             | Stosovic           | The predictive value of anthropometric parameters on mortality in haemodialysis patients                                                                                    |
| 2012 | American Journal of Nephrology                                                                  | Takahashi          | Combined values of serum albumin, C-reactive protein and body mass index at dialysis initiation accurately predicts long-term mortality in hemodialysis patients            |
| 2013 | Annals of Internal Medicine                                                                     | Tangri             | Risk prediction models for patients with chronic kidney disease: a systematic review                                                                                        |
| 2012 | Blood Purification                                                                              | Thijssen           | Prediction of mortality in the first two years of hemodialysis: results of a validation study                                                                               |
| 2013 | International Urology & Nephrology                                                              | Toledo             | Validity of malnutrition scores for predicting mortality in chronic hemodialysis patients                                                                                   |
| 2006 | Journal of the American Society of Nephrology                                                   | Tonelli            | Chronic kidney disease and mortality risk: A systematic review                                                                                                              |
| 2005 | American Journal of Nephrology                                                                  | Trivedi            | Predictors of death in patients on peritoneal dialysis: the Missoula Peritoneal Dialysis Study                                                                              |
| 2010 | Nephrology Dialysis Transplantation                                                             | Tsai               | Quality of life predicts risks of end-stage renal disease and mortality in patients with chronic kidney disease.[Erratum appears in Nephrol Transplant. 2011 Jan;26(1):392] |
| 2014 | PLoS ONE                                                                                        | van Diepen         | Predicting Mortality in Patients with Diabetes Starting Dialysis                                                                                                            |

|      |                                                      |                |                                                                                                                                                                                       |
|------|------------------------------------------------------|----------------|---------------------------------------------------------------------------------------------------------------------------------------------------------------------------------------|
| 2010 | Nephron                                              | Verdalles      | Factors predicting mortality in elderly patients on dialysis                                                                                                                          |
| 2011 | American Journal of Kidney Diseases                  | Wagner         | Predicting mortality in incident dialysis patients: an analysis of the United Kingdom Renal Registry                                                                                  |
| 1997 | American Journal of Kidney Diseases                  | DeOreo         | Hemodialysis patient-assessed functional health status predicts survival, hospitalization, and dialysis-attendance compliance                                                         |
| 2001 | Journal of the American Society of Nephrology        | Kalantar-Zadeh | Association among SF36 quality of life measures and nutrition, hospitalization, and mortality in hemodialysis                                                                         |
| 2002 | Journal of renal nutrition                           | Allen          | Association of nutritional markers with physical and mental health in prevalent hemodialysis patients from the HEMO study                                                             |
| 2004 | Nephrology Dialysis Transplantation                  | Covic          | Illness representations and quality of life scores in haemodialysis patients                                                                                                          |
| 2008 | Nephrology                                           | Bilgic         | Predictors for quality of life in continuous ambulatory peritoneal dialysis patients                                                                                                  |
| 2008 | Nephrology Dialysis Transplantation                  | Elder          | Sleep quality predicts quality of life and mortality risk in haemodialysis patients: Results from the Dialysis Outcomes and Practice Pattern Study (DOPPS)                            |
| 2009 | Diabetic Medicine                                    | Hayashino      | Low health-related quality of life is associated with all-cause mortality in dialysis patients with diabetes on haemodialysis: The Japan Dialysis Outcomes and Practice Pattern Study |
| 2012 | Saudi journal of kidney diseases and transplantation | Guney          | Poor quality of life is associated with increased mortality in maintenance hemodialysis patients: a prospective cohort study                                                          |
| 2012 | Kidney Research and Clinical Practice                | Jeon           | The effect of depression and health-related quality of life on the survival of hemodialysis patients                                                                                  |
| 2015 | Journal of Pain and Symptom Management               | Amro           | Symptom clusters predict mortality among dialysis patients in a 12-month prospective observational cohort study                                                                       |
| 2015 | Nephron                                              | Broers         | Quality of Life in Dialysis Patients: A Retrospective Cohort Study                                                                                                                    |
| 2015 | Blood Purification                                   | Germain        | How to integrate predictions in outcomes in planning clinical care in dialysis                                                                                                        |
| 2016 | International Urology and Nephrology                 | Griva          | Predicting technique and patient survival over 12 months in peritoneal dialysis: the role of anxiety and depression                                                                   |
| 2016 | Hong Kong Journal of Nephrology                      | Kwok           | Outcomes in elderly patients with end-stage renal disease: Comparison of renal replacement therapy and conservative management                                                        |
| 2016 | Biomarkers                                           | Sousa-Martins  | Risk factors for mortality in end-stage kidney disease patients undergoing hemodiafiltration: three-year follow-up study                                                              |
| 2017 | Clinical Nutrition ESPEN                             | Borges         | Malnutrition Inflammation Score cut-off predicting mortality in maintenance hemodialysis patients                                                                                     |
| 2017 | Systematic Reviews                                   | Brett          | Physical frailty and functional status in patients with advanced kidney disease: a protocol for a systematic review                                                                   |
| 2017 | Peritoneal Dialysis International                    | Chan           | Association of socio-economic position with technique failure and survival in Australian non-indigenous peritoneal dialysis patients                                                  |
| 2017 | Archives of Gerontology & Geriatrics                 | Chowdhury      | Frailty and chronic kidney disease: A systematic review                                                                                                                               |

|      |                                                                                |             |                                                                                                                                                                                |
|------|--------------------------------------------------------------------------------|-------------|--------------------------------------------------------------------------------------------------------------------------------------------------------------------------------|
|      | Geriatrics                                                                     |             |                                                                                                                                                                                |
| 2017 | BMC Nephrology                                                                 | Clark       | Frailty in end-stage renal disease: comparing patient, caregiver, clinician perspectives                                                                                       |
| 2017 | Nephrology Dialysis Transplantation                                            | Couchoud    | Restricted mean survival time over 15 years for patients starting replacement therapy                                                                                          |
| 2017 | PLoS ONE                                                                       | Dai         | Clinical global assessment of nutritional status as predictor of mortality in chronic kidney disease patients                                                                  |
| 2017 | American Journal of Kidney Diseases                                            | Derrett     | Predictors of Health Deterioration Among Older Adults After 12 Months of Dialysis Therapy: A Longitudinal Cohort Study From New Zealand                                        |
| 2017 | Asia Pacific Journal of Clinical Nutrition                                     | Dou         | The geriatric nutritional risk index may predict healthcare costs and hospital transitions during hemodialysis in China                                                        |
| 2017 | KI Reports                                                                     | Doulgerakis | Cardiac Autonomic Neuropathy Predicts All-Cause and Cardiovascular Mortality in Patients With End-Stage Renal Failure: A 5-Year Prospective Study                              |
| 2017 | 30th Annual Congress of the European Society of Intensive Care Medicine, ESICM | Hamada      | Short-term mortality after continuous renal replacement therapy in intensive care maintenance hemodialysis patients: A scoring system of short-term mortality risk after CRRT  |
| 2017 | Peritoneal Dialysis International                                              | Hoffman     | Outcomes of PD patients at 6 months                                                                                                                                            |
| 2017 | Nephrology Dialysis Transplantation                                            | Ito         | Peritoneal dialysis and hemodialysis; A survival comparison in the elderly old patients in Japan                                                                               |
| 2017 | Clinical Epidemiology                                                          | Janmaat     | Effect of glomerular filtration rate at dialysis initiation on survival in elderly patients with advanced chronic kidney disease: What is the effect of lead time bias?        |
| 2017 | Nutrients                                                                      | Kang        | Nutritional status predicts 10-year mortality in patients with end-stage renal disease on hemodialysis                                                                         |
| 2017 | Nephrology                                                                     | Kanno       | Suboptimal initiation predicts short-term prognosis and vulnerability among very elderly patients who start hemodialysis                                                       |
| 2017 | Journal of Nephropathology                                                     | Khazaei     | Predictors of long-term survival of hemodialysis patients in Hamadan province, west of Iran                                                                                    |
| 2017 | PLoS ONE                                                                       | Kim         | Lower education level is a risk factor for peritonitis and technique failure but not a risk for overall mortality in peritoneal dialysis under a comprehensive training system |
| 2017 | Indian Journal of Nephrology                                                   | Kirushnan   | Impact of malnutrition, inflammation, and atherosclerosis on mortality in hemodialysis patients                                                                                |
| 2017 | Transplantation                                                                | Laham       | Nonprogrammed Vascular Access Is Associated with Greater Mortality in Hemodialysis Patients Who Return to Hemodialysis with a Failing Renal Graft                              |
| 2017 | Kidney Research and Clinical Practice                                          | Lee         | Heart rate is associated with mortality in patients undergoing continuous renal replacement therapy                                                                            |
| 2017 | American Journal of Nephrology                                                 | Nee         | Pre-End-Stage Renal Disease Care and Early Survival among Incident Hemodialysis Patients in the US Military Health System                                                      |
| 2018 | Palliative Medicine                                                            | Forzley     | External validation and clinical utility of a prediction model for 6-month mortality in patients undergoing hemodialysis for end-stage kidney disease                          |
| 2018 | BMC Nephrology                                                                 | Hall        | Association of Kidney Disease Quality of Life (KDQOL-36) with mortality and hospitalization in older adults receiving hemodialysis                                             |
| 2018 | Tehran University                                                              | Jahantigh   | A model for predicting peritoneal dialysis patients' survival, using clinical and laboratory variables                                                                         |



|      |                                      |                        |                                                                                                                                                                                        |
|------|--------------------------------------|------------------------|----------------------------------------------------------------------------------------------------------------------------------------------------------------------------------------|
|      | Medical Journal                      |                        | mining algorithms. [Persian]                                                                                                                                                           |
| 2018 | PLoS ONE                             | Jung                   | Individualized prediction of mortality using multiple inflammatory markers in patients on dialysis                                                                                     |
| 2016 | BMC Neph                             | Ayav                   | Competing risk of death and end-stage renal disease in incident kidney disease (stages 3 to 5): the EPIRAN community-based study                                                       |
| 2016 | Clin Kid J                           | Pugh                   | Frailty and comorbidity are independent predictors of outcome in patients referred for pre-dialysis education                                                                          |
| 2016 | Int J Cardiology                     | Anker                  | Development and validation of cardiovascular risk scores for haemodialysis patients                                                                                                    |
| 2015 | Int J Med Sci                        | Cao                    | Predicting One-Year Mortality in Peritoneal Dialysis Patients: An Analysis of the China Peritoneal Dialysis Registry                                                                   |
| 2015 | PLoS ONE                             | Park                   | Recalibration and Validation of the Charlson Comorbidity Index in Incident Hemodialysis Patients                                                                                       |
| 2015 | Ing J Gerontology                    | Wu                     | The Effects of Survival Predictors before Hemodialysis Initiation in Adults and the Elderly                                                                                            |
| 2015 | Nephron                              | Grincenkov             | Impact of baseline health-related quality of life scores on survival in incident patients on peritoneal dialysis: a cohort study                                                       |
| 2016 | Int Urology & Nephrology             | Griva                  | Predicting technique and patient survival over 12 months in peritoneal dialysis: the role of anxiety and depression.                                                                   |
| 2014 | Blood Purification                   | Chua                   | Predicting first-year mortality in incident dialysis patients with end-stage renal disease - the UREA5 study                                                                           |
| 2014 | J Cardiology                         | Takahashi              | Geriatric nutritional risk index accurately predicts cardiovascular mortality in incident hemodialysis patients                                                                        |
| 2016 | Clin Nutrition                       | Beberashvili           | Geriatric nutritional risk index, muscle function, quality of life and mortality outcome in hemodialysis patients                                                                      |
| 2016 | Revista Latino-America de Enfermagem | de Oliveira            | Health-related quality of life as a predictor of mortality in patients on peritoneal dialysis                                                                                          |
| 2015 | J Renal Nutrition                    | de Roij van Zuijdewijn | A Comparison of 8 Nutrition-Related Tests to Predict Mortality in Incident Hemodialysis Patients                                                                                       |
| 2015 | PLoS ONE                             | Kanda                  | Importance of simultaneous evaluation of multiple risk factors for incident hemodialysis patients' mortality and development of a novel index for outcomes and practice patterns study |
| 2016 | J Renal Nutrition                    | Santin                 | Concurrent and Predictive Validity of Composite Methods to Assess Nutritional Status in Older Adults on Hemodialysis                                                                   |
| 2014 | Eur J Clin Investigation             | Zhao                   | Risk score to predict mortality in continuous ambulatory peritoneal dialysis patients                                                                                                  |
| 2014 | Perit dial int                       | Kumar                  | PREDICTORS OF PERITONITIS, HOSPITAL DAYS, AND TECHNIQUE FAILURE FOR PERITONEAL DIALYSIS PATIENTS IN A MANAGED CARE SETTING                                                             |
| 2016 | Clin Exp Nephrol                     | Inaguma                | Physical function at the time of dialysis initiation is associated with subsequent mortality                                                                                           |
| 2017 | PLoS ONE                             | Magalhaes              | Predictive factors of one-year mortality in a cohort of patients undergoing urgent-start Hemodialysis                                                                                  |
| 2016 | Iranian J Kidney Disease             | Ossarah                | Survival of Patients on Hemodialysis and Predictors of Mortality                                                                                                                       |

|      |                                     |              |                                                                                                                                                         |
|------|-------------------------------------|--------------|---------------------------------------------------------------------------------------------------------------------------------------------------------|
| 2014 | Int Urology & Nephrology            | Serafinceanu | Impact of gender and dialysis modality on early mortality risk in ESRD patients                                                                         |
| 2016 | J Renal Nutrition                   | Caetano      | Body composition and Mortality Predictors in HD patients                                                                                                |
| 2015 | Nephron                             | Bossola      | Fatigue is associated with Increased Risk of Mortality in Patients Hemodialysis                                                                         |
| 2018 | BMC Nephrology                      | Cai          | Prognostic value of inflammation-based prognostic score is on o patient is undergoing continuous ambulatory peritoneal dialysis                         |
| 2018 | Nephrology Dialysis Transplantation | Fitzpatrick  | Frailty, body composition and the risk of mortality in incident he patients: the Predictors of Arrhythmic and Cardiovascular Risk i Renal Disease study |
| 2018 | Nephrology Dialysis Transplantation | Fukuma       | Development and validation of a production mono for loss of ph function in elderly hemodialysis patients                                                |
| 2018 | Nephrology Dialysis Transplantation | Guinea       | Survival and comorbidity in patients on renal replacement thera                                                                                         |
| 2018 | Perit dial int                      | Kamijo       | Sarcopenia and frailty in PD: Impact on mortality, malnutrition, inflammation                                                                           |
| 2018 | Blood Purification                  | Lai          | Factors associated with functional performance among patients hemodialysis in Taiwan                                                                    |
| 2018 | Kidney Blood Pressure and Research  | Zhang        | Derivation and validation of risks scores to predict cerebrovascu mortality among incident peritoneal dialysis patients                                 |

1

2 **Supplemental Table 2** Overview of predictive variables by index

3

4 **Variables included in predictive indices**

| Index                              | Age | Gender | Race | Functiona<br>l Status | Comorbidities | BMI/weigh<br>t loss/<br>nutritional<br>status | Albumin | GFR/<br>creatinine | Other<br>Labs | CKD<br>etiology | Context | Access<br>type | Smoking | Hospitali<br>zations/<br>readmis<br>sions | Other |
|------------------------------------|-----|--------|------|-----------------------|---------------|-----------------------------------------------|---------|--------------------|---------------|-----------------|---------|----------------|---------|-------------------------------------------|-------|
| ACPI                               | X   |        |      |                       | X             |                                               |         |                    |               |                 |         |                |         |                                           |       |
| AR0ii                              | X   |        |      |                       | X             | X                                             | X       | X                  | X             | X               |         | X              | X       |                                           | X     |
| Barthels                           |     |        |      | X                     |               |                                               |         |                    |               |                 |         |                |         |                                           |       |
| CCI                                | X   |        |      |                       | X             |                                               |         |                    |               |                 |         |                |         |                                           |       |
| CCI Beddhu                         | X   |        |      |                       | X             |                                               |         |                    |               |                 |         |                |         |                                           |       |
| CCI Di Iorio                       | X   |        |      |                       |               |                                               |         |                    |               |                 |         |                |         | X                                         |       |
| CCI<br>Hemmelgar<br>n              | X   |        |      |                       | X             |                                               |         |                    |               |                 |         |                |         |                                           |       |
| Davies                             |     |        |      |                       | X             |                                               |         |                    |               |                 |         |                |         |                                           |       |
| Doi                                |     |        |      | X                     | X             |                                               |         | X                  | X             |                 |         |                |         |                                           | X     |
| ESRD-SI                            |     |        |      |                       | X             |                                               |         |                    |               |                 |         |                |         |                                           |       |
| Foley                              | X   |        |      |                       | X             |                                               |         |                    |               |                 |         |                |         |                                           | X     |
| Hospice<br>Eligibility<br>Criteria |     |        |      | X                     |               | X                                             | X       |                    |               |                 |         |                |         | X                                         |       |
| Ivory                              | X   |        |      |                       | X             | X                                             |         |                    |               | X               | X       |                |         |                                           |       |
| Karnofsky                          |     |        |      | X                     |               |                                               |         |                    |               |                 |         |                |         |                                           |       |
| Khan-<br>Wright                    | X   |        |      |                       | X             |                                               |         |                    |               |                 |         |                |         |                                           |       |
| mCCI-IPD                           | X   | X      |      |                       | X             |                                               |         |                    |               |                 |         |                |         |                                           |       |
| NCI-Liu                            |     |        |      |                       | X             |                                               |         |                    |               |                 |         |                |         |                                           |       |
| NYHA                               |     |        |      | X*                    |               |                                               |         |                    |               |                 |         |                |         |                                           |       |
| Obi low                            | X   |        | X    |                       | X             | X                                             |         | X                  | X             |                 |         |                |         |                                           |       |
| Obi high                           |     |        |      |                       |               |                                               |         |                    |               |                 |         |                |         |                                           |       |
| REIN                               |     |        |      | X                     | X             | X                                             |         |                    |               |                 | X       |                |         |                                           | X     |

|                      |                                |   |   |   |   |   |   |   |   |   |   |   |   |   |   |
|----------------------|--------------------------------|---|---|---|---|---|---|---|---|---|---|---|---|---|---|
| REIN abbreviated     |                                |   |   |   | x | x |   |   |   |   | x |   |   |   | x |
| REIN updated         | X                              | X |   | X | X |   | X |   |   |   |   |   |   |   | X |
| SF 36 PCS            | N/A Survey responses           |   |   |   |   |   |   |   |   |   |   |   |   |   |   |
| SF 36 MCS            | N/A Survey responses           |   |   |   |   |   |   |   |   |   |   |   |   |   |   |
| RMRC                 | X                              | X |   | X | X | X |   |   |   | X | X |   |   |   |   |
| Rule based model     | Complex computerized algorithm |   |   |   |   |   |   |   |   |   |   |   |   |   |   |
| Thamer Simple        | X                              |   |   | X | X |   | X |   |   |   |   |   |   | X |   |
| Thamer comprehensive | X                              | X | X | X | X |   | X | X |   |   | X | X |   | X |   |
| Van Manen            | X                              |   |   |   | X |   |   |   |   |   |   |   |   |   |   |
| Wagner               | X                              | X | X |   | X |   | X | X | X |   | X |   | X |   | X |
| Wick                 | X                              |   |   |   | X |   |   | X |   |   |   |   |   | X |   |
| Complex frailty      |                                |   |   | X | X | X | X |   |   |   |   |   |   |   | X |

1 \* symptoms affecting functional status. Other included; behavioral disorder (REIN and updated REIN), dementia and risk of delirium (Complex  
2 Frailty), ventilator dependency (Foley), ESA non use (Doi) Treatment modality (Wagner) and Dialysis blood flow (AROIi)

3  
4  
5  
6

### Supplemental Table 3 Predictive Variables and scoring of Included Indices

| Index | Studies Utilizing Index | Predictive Variables | Score Cutoffs and Associated Mortality Risk |
|-------|-------------------------|----------------------|---------------------------------------------|
|-------|-------------------------|----------------------|---------------------------------------------|

|                                         |                                                  |                                                                                                                                                                                                                                                    |                                                                                 |                              |                      |
|-----------------------------------------|--------------------------------------------------|----------------------------------------------------------------------------------------------------------------------------------------------------------------------------------------------------------------------------------------------------|---------------------------------------------------------------------------------|------------------------------|----------------------|
| Age-comorbidity prognostic index (ACPI) | Fernandez Lucas et al, 2007                      | Points assigned based on:                                                                                                                                                                                                                          | Score                                                                           | 3yr mortality                |                      |
|                                         | Marinovich et al, 2010                           | 2 - Age 50-60 yr<br>3 - Age >60 yr<br>3 - Ischemic heart disease w/ CHF<br>1 - Noncontrolled hypertension<br>1 - Atrial fibrillation<br>1 - COPD<br>1 - GI disease<br>2 - Systemic diseases<br>2 - Diabetes<br>2 - PVD<br>4 - Malignancy <5 years  | 0-1<br>2-4<br>≥5                                                                | 11%<br>23%<br>46%            |                      |
| AROIi                                   | Floege et al, 2015                               | Age                                                                                                                                                                                                                                                | Score                                                                           | 1 yr mort                    | 2 yr mort            |
|                                         |                                                  | Smoking status<br>Cardiovascular disease history<br>Cancer history<br>CKD etiology<br>BMI<br>Vascular access<br>Dialysis blood flow<br>Serum hemoglobin<br>Serum ferritin<br>Serum CRP<br>Serum albumin<br>Serum creatinine<br>Serum total calcium | 5<br>6-10<br>≥ 11                                                               | <9%<br>9-<19%<br>15- <29     | <15%<br>≥19%<br>≥29% |
| Barthels                                | Inaguma et al, 2017                              | Points assigned based on independence in the following factors:                                                                                                                                                                                    | Score                                                                           | Mortality (unclear f/u time) |                      |
|                                         |                                                  | Eating<br>Washing<br>Dressing<br>Personal hygiene<br>Stools<br>Micturition<br>Use of restroom<br>Movement<br>Walking<br>Stairs                                                                                                                     | 100 (H)<br>75-99 (M)<br><75 (L)                                                 | 12%<br>24%<br>38%            |                      |
| CCI                                     | Fernandez Lucas et al, 2007<br>Fried et al, 2001 | Points assigned based on:<br>1 - Age 50-60 yr                                                                                                                                                                                                      | Variable cutoffs in different studies. High risk defined as ≥6-8 with mortality |                              |                      |

Includes Nomogram figure

Hemmelgarn et al, 2003  
 Kan et al, 2013  
 Marinovich et al, 2010  
 van Manen et al, 2002  
 Gomez et al, 2015  
 Wick et al, 2017

- 2 - Age 60-70 yr
- 3 - Age >70 yr
- 1 - Myocardial infarction
- 1 - CHF
- 1 - CVD
- 2 - Hemiplegia
- 1 - Dementia
- 1 - PVD
- 1 - COPD
- 1 - GI disease
- 1 - Systemic diseases
- 1 - Diabetes
- 2 - Diabetes w/ end organ damage
- 1/2/3 - Mild/moderate/severe liver disease
- 1 - Connective tissue disease
- 1 - Peptic ulcer disease
- 2 - Moderate or severe renal disease
- 2 - Tumor without metastasis
- 2 - Leukemia/lymphoma
- 6 - Metastatic solid tumor
- 6- AIDS

presented in KM curves without giving absolute survival cutoffs.

|                |                      |                                                                                                                                                                     |                                 |                                                   |
|----------------|----------------------|---------------------------------------------------------------------------------------------------------------------------------------------------------------------|---------------------------------|---------------------------------------------------|
| CCI (Beddhu)   | Beddhu et al, 2002   | CCI – modified<br>Beddhu scored all patients with any form of coronary artery disease instead of only assigning 1 point to those with a prior myocardial infarction | <b>Score</b><br>≤3<br>4-5<br>≥6 | <b>HR for death</b><br>1 Referent<br>7.5<br>7.6   |
| CCI (Di Iorio) | Di Iorio et al, 2004 | CCI + 1 point for each day of non-surgical hospitalization                                                                                                          | <b>Score</b><br>≥6              | <b>Mortality rate/<br/>dialysis years</b><br>~60% |

|                                      |                                                                                                                            |                                                                                                                                                                                                                                                                                                                                                                      |                                                                                                  |                                                                                               |
|--------------------------------------|----------------------------------------------------------------------------------------------------------------------------|----------------------------------------------------------------------------------------------------------------------------------------------------------------------------------------------------------------------------------------------------------------------------------------------------------------------------------------------------------------------|--------------------------------------------------------------------------------------------------|-----------------------------------------------------------------------------------------------|
| CCI (Hemmelgarn)                     | Hemmelgarn et al, 2003<br>Geddes et al, 2006<br>Fernandez Lucas et al, 2007<br>Marinovich et al, 2010<br>Gomez et al, 2015 | CCI with the following weights based on Cox modeling:<br>2 - Myocardial infarction<br>2 - CHF<br>2 - CVD<br>1 - Dementia<br>1 - PVD<br>1 - COPD<br>2 - Diabetes<br>1 - Diabetes w/ end organ damage<br>2 - Moderate/severe liver disease<br>1 - Connective tissue disease<br>1 - Peptic ulcer disease<br>2 - Leukemia<br>5 - Lymphoma<br>10 - Metastatic solid tumor | <b>Score =&gt;</b><br>9-15<br>6-8<br>4-5<br>2-3<br>0-1                                           | <b>survival</b><br><3months<br>3-12 months<br>12-24 months<br>24-60 months<br>>60 months [46] |
| mCCI-IPD                             | Cho et al, 2017                                                                                                            | Age<br>Sex<br>Comorbidities:<br>Mild liver disease<br>Chronic pulmonary disease<br>Myocardial infarction<br>Hemiplegia<br>Congestive heart failure<br>Diabetes<br>Any tumor (including leukemia and lymphoma)<br>Cerebrovascular disease<br>Diabetes with end-organ damage<br>Moderate to severe liver disease<br>Metastatic solid tumor                             | <b>Score</b><br>0<br>1-3 ≤ 25th percentile<br>4-5 25th – 75th percentile<br>≥6 > 75th percentile | <b>Kaplan Meier curves</b>                                                                    |
| Davies (Stoke Comorbidity Grade SCG) | Davies et al, 2002<br>van Manen et al, 2002                                                                                | 1 - Malignancy<br>1 - Ischemic heart disease<br>1 - Peripheral vascular disease<br>1 - Left ventricular dysfunction<br>1 - Diabetes mellitus<br>1 - Systemic collagen vascular disease<br>1 - Other significant pathology severe enough to have an impact on survival                                                                                                | <b>Score</b><br>0 Low<br>1-2 Medium<br>≥3 High                                                   | <b>Mortality (unclear f/u time)</b><br>23%<br>50%<br>64%                                      |

|                                                   |                                          |                                                                                |          |                   |
|---------------------------------------------------|------------------------------------------|--------------------------------------------------------------------------------|----------|-------------------|
| Doi                                               | Doi et al, 2015                          | Points assigned based on:                                                      | Score    | 1 yr mortality    |
|                                                   |                                          | 1 - eGRF>7 mL/min per 1.73                                                     | 0-4      | 2.5%              |
|                                                   |                                          | 1 - serum albumin<3.5 g/dl                                                     | 5-6      | 5.5%              |
|                                                   |                                          | 2 - serum calcium>8.5 mg/dl                                                    | 7-8      | 15.2%             |
| ESRD-SI (RDSS)                                    | Postorino et al, 2007                    | 2 - modified CCI 1-2                                                           | 9-12     | 28.9%             |
|                                                   |                                          | 3 - modified CCI >=3                                                           |          |                   |
|                                                   |                                          | 1 - performance status 1-2                                                     |          |                   |
|                                                   |                                          | 3 - performance status 3-4                                                     |          |                   |
|                                                   |                                          | 2 - ESA non-use                                                                |          |                   |
|                                                   |                                          | 11 disease categories rated on a scale of 0-10 with complex coding scheme [79] | Score    | Hazard Ratio      |
|                                                   |                                          | Heart disease                                                                  | 0-20     | 1 referent        |
|                                                   |                                          | Cerebral Vascular Disease                                                      | 21-40    | 2.05 (1.66–2.55)  |
|                                                   |                                          | Peripheral vascular disease                                                    | >40      | 4.59 (3.06–6.87)  |
|                                                   |                                          | Peripheral neuropathy                                                          |          |                   |
| Bone disease                                      |                                          |                                                                                |          |                   |
| Respiratory disease                               |                                          |                                                                                |          |                   |
| Visual impairment                                 |                                          |                                                                                |          |                   |
| Autonomic neuropathy and gastrointestinal disease |                                          |                                                                                |          |                   |
| Access and dialysis events                        |                                          |                                                                                |          |                   |
| Diabetes                                          |                                          |                                                                                |          |                   |
| Other                                             |                                          |                                                                                |          |                   |
| Foley                                             | Foley et al, 1994<br>Barrett et al, 1997 | Points assigned based on:                                                      | Score => | 6 month mortality |
|                                                   |                                          | 1 - Age <50                                                                    | <4       | 4%                |
|                                                   |                                          | 2 - Age 51-60                                                                  | 5-6      | 33%               |
|                                                   |                                          | 3 - Age 61-70                                                                  | 7-8      | 47%               |
|                                                   |                                          | 4 - Age >70                                                                    | 9≤       | 90%               |
|                                                   |                                          | 1/2 - Moderate/severe cardiac failure                                          | 10≤      | 100%              |
|                                                   |                                          | 1/2 - Moderate/severe ischemic heart disease                                   |          |                   |
|                                                   |                                          | 2 - Arrhythmia requiring therapy                                               |          |                   |
|                                                   |                                          | 2 - Severe PVD                                                                 |          |                   |
|                                                   |                                          | 2 - Advanced neoplasia                                                         |          |                   |
|                                                   |                                          | 4 - Comatose                                                                   |          |                   |
|                                                   |                                          | 4 - Sepsis                                                                     |          |                   |
|                                                   |                                          | 4 - Hepatic failure                                                            |          |                   |
| 4 - Ventilator dependence                         |                                          |                                                                                |          |                   |
| Hospice eligibility                               | Cheung et al, 2014                       | Evaluated the five general clinical criteria since most                        | Score    | 6 month mortality |



| criteria | patients would meet the disease-specific criteria for ESRD: |                                                             | Age           |                |      |
|----------|-------------------------------------------------------------|-------------------------------------------------------------|---------------|----------------|------|
|          |                                                             |                                                             | 67-74         | 75-84          | 85+  |
|          | 1. Readmission within 2 month                               | 0                                                           | 5.7           | 9.0            | 14.9 |
|          | 2. Use of home care services                                | 1                                                           | 13.5          | 19.7           | 28.2 |
|          | 3. Dependence in $\geq 3$ activities of daily living        | 2                                                           | 22.5          | 32.1           | 39.8 |
|          | 4. Weight loss $>2.3$ kg                                    | $\geq 3$                                                    | 39.3          | 47.7           | 51.2 |
|          | 5. Albumin $<25$ g/L                                        |                                                             |               |                |      |
| Ivory    | Ivory et al, 2017                                           | 1.6 - Age, per 10 years                                     | Score         | 6 mo mortality |      |
|          |                                                             | BMI Category                                                |               |                |      |
|          |                                                             | 2 - Underweight                                             |               | 0.5%           |      |
|          |                                                             | 0 - Normal weight                                           | 6 or less     | 1.7%           |      |
|          |                                                             | -1 - Overweight/Obese                                       | 6.1-10        | 5.0%           |      |
|          |                                                             | 1 - Chronic Lung Disease                                    | 10.1-14       | 12.0%          |      |
|          |                                                             | 2 - Coronary Artery Disease                                 | 14.1-18       | 20.5%          |      |
|          |                                                             | 1 - Peripheral Vascular Disease                             | 18.1 or above |                |      |
|          |                                                             | 3 - Cerebrovascular Disease and age $<60$ y                 |               |                |      |
|          |                                                             | 1 - Cerebrovascular Disease and age $60+$ y                 |               |                |      |
|          |                                                             | 3 - Late referral                                           |               |                |      |
|          |                                                             | Primary renal disease                                       |               |                |      |
|          |                                                             | 0 - Diabetic Nephropathy, Gomerulonephritis or hypertension |               |                |      |
|          |                                                             | -2 - Polycystic                                             |               |                |      |
|          |                                                             | 2 - Other                                                   |               |                |      |

|             |                                                                                                                                 |                                                                                                                                                                                                                                                                                                                                                                                                                                                                                                                                                                                                                                                                                                                                                                                                                                                                                                                                     |          |      |                                |
|-------------|---------------------------------------------------------------------------------------------------------------------------------|-------------------------------------------------------------------------------------------------------------------------------------------------------------------------------------------------------------------------------------------------------------------------------------------------------------------------------------------------------------------------------------------------------------------------------------------------------------------------------------------------------------------------------------------------------------------------------------------------------------------------------------------------------------------------------------------------------------------------------------------------------------------------------------------------------------------------------------------------------------------------------------------------------------------------------------|----------|------|--------------------------------|
| Karnofsky   | Lopez Revuelta et al, 2004                                                                                                      | <p>100 - Normal no complaints; no evidence of disease.<br/> 90 - Able to carry on normal activity; minor signs or symptoms of disease.<br/> 80 - Normal activity with effort; some signs or symptoms of disease.<br/> 70 - Cares for self; unable to carry on normal activity or to do active work.<br/> 60 - Requires occasional assistance, but is able to care for most of his personal needs. Unable to work;<br/> 50 - Requires considerable assistance and frequent medical care.<br/> 40 - Disabled; requires special care and assistance.<br/> 30 - Severely disabled; hospital admission is indicated although death not imminent.<br/> 20 - Very sick; hospital admission necessary active supportive treatment necessary.<br/> 10 - Moribund; fatal processes progressing rapidly. Unable to care for self; requires equivalent of institutional or hospital care; disease may be progressing rapidly.<br/> 0 - Dead</p> |          |      |                                |
| Khan-Wright | <p>Khan et al, 1993<br/> Khan et al, 1998<br/> van Manen et al, 2002<br/> Marinovich et al, 2010<br/> Postorino et al, 2007</p> | <p>Patients divided into the following risk groups:<br/> <i>Low:</i> Age &lt;70 and no comorbid illness<br/> <i>Medium:</i> Age 70-80 years OR Age &lt;80 with angina, previous MI, CHF, COPD, pulmonary fibrosis, or liver disease OR Age &lt;70 with diabetes<br/> <i>High:</i> Age &gt;80 years OR Any age with two or more organ dysfunctions in addition to ESRD OR any age with diabetes and cardiopulmonary disease OR any age with visceral malignancy</p>                                                                                                                                                                                                                                                                                                                                                                                                                                                                  | Score    | 2 yr | HR                             |
|             |                                                                                                                                 | <p><i>Low:</i> Age &lt;70 and no comorbid illness</p>                                                                                                                                                                                                                                                                                                                                                                                                                                                                                                                                                                                                                                                                                                                                                                                                                                                                               | Low (1)  | 10%  | 1 Referent (60)<br>2.77 (2.14– |
|             |                                                                                                                                 | <p><i>Medium:</i> Age 70-80 years OR Age &lt;80 with angina, previous MI, CHF, COPD, pulmonary fibrosis, or liver disease OR Age &lt;70 with diabetes</p>                                                                                                                                                                                                                                                                                                                                                                                                                                                                                                                                                                                                                                                                                                                                                                           | Med (2)  | 30%  | 3.57)                          |
|             |                                                                                                                                 | <p><i>High:</i> Age &gt;80 years OR Any age with two or more organ dysfunctions in addition to ESRD OR any age with diabetes and cardiopulmonary disease OR any age with visceral malignancy</p>                                                                                                                                                                                                                                                                                                                                                                                                                                                                                                                                                                                                                                                                                                                                    | High (3) | 54%  | 5.07 (3.94–<br>6.53)           |

|                               |                                       |                                                                                                                                                                                                                                                                      |            |                        |         |             |  |  |                                                                                                                                                           |
|-------------------------------|---------------------------------------|----------------------------------------------------------------------------------------------------------------------------------------------------------------------------------------------------------------------------------------------------------------------|------------|------------------------|---------|-------------|--|--|-----------------------------------------------------------------------------------------------------------------------------------------------------------|
| Multi factorial frailty score | Lee et al,                            | Three categories for each of the following, scored 0, 1 and 2<br>Malignant disease<br>CCI<br>Albumin mg/g<br>ADL (Modified Barthel's)<br>IADL (Lawton and Brody Index)<br>Dementia (K-MMSE)<br>Risk of delirium (NDS)<br>Malnutrition (MNA)<br>Mid-Arm circumference |            |                        |         |             |  |  | HR<br>Frailty defined as a score of $\geq 10$<br>Frailty yes vs. no 4.03 (0.96-16.93) p = 0.057<br>Every 1 point score increase 1.63 (1.01-2.65; p=0.047) |
| New Comorbidity Index (nCI)   | Kan et al, 2013<br>Cheung et al, 2014 | Points assigned based on the following comorbidities:<br>1 - Diabetes<br>3 - CHF<br>1 - CAD<br>2 - CVD<br>2 - PVD<br>2 - Other cardiac disease<br>2 - Arrhythmia<br>2 - COPD<br>2 - GI bleeding<br>2 - Liver disease<br>2 - Cancer                                   | Score      |                        |         |             |  |  | Life expectancy<br>65-69 y    75-79 y $\geq 85$ y                                                                                                         |
|                               |                                       |                                                                                                                                                                                                                                                                      | $\leq 3$   | 6.42                   | 4.97    | 3.05        |  |  |                                                                                                                                                           |
|                               |                                       |                                                                                                                                                                                                                                                                      | 4-6        | 5.14                   | 4.08    | 2.82        |  |  |                                                                                                                                                           |
|                               |                                       |                                                                                                                                                                                                                                                                      | 7-9        | 4.39                   | 3.48    | 2.55        |  |  |                                                                                                                                                           |
|                               |                                       |                                                                                                                                                                                                                                                                      | $\geq 10$  | 3.79                   | 3.22    | 2.13        |  |  |                                                                                                                                                           |
|                               |                                       |                                                                                                                                                                                                                                                                      | Score      | 6 month mortality [45] |         |             |  |  |                                                                                                                                                           |
|                               |                                       |                                                                                                                                                                                                                                                                      |            | 67-74 y                | 75-84 y | $\geq 85$ y |  |  |                                                                                                                                                           |
|                               |                                       |                                                                                                                                                                                                                                                                      | $\leq 3$   | 6.5%                   |         | 30.6%       |  |  |                                                                                                                                                           |
|                               |                                       |                                                                                                                                                                                                                                                                      | 4-6        | 11.4%                  | 12.4%   | 27.6%       |  |  |                                                                                                                                                           |
|                               |                                       |                                                                                                                                                                                                                                                                      | 7-9        | 15.1%                  | 17.2%   | 32.3%       |  |  |                                                                                                                                                           |
|                               |                                       |                                                                                                                                                                                                                                                                      | $\geq 10$  | 23.7%                  | 20.1%   | 38.4%       |  |  |                                                                                                                                                           |
|                               |                                       |                                                                                                                                                                                                                                                                      |            |                        | 30.7%   |             |  |  |                                                                                                                                                           |
| NYHA Classification           | Postorino et al, 2007                 | NYHA classification:<br>Class 0: No functional limitations<br>Class 1: Occasional exertional dyspnea<br>Class 2: Ordinary physical activity results in dyspnea<br>Class 3: Marked limitation of physical activity<br>Class 4: Symptoms of heart failure at rest      | Score      |                        |         |             |  |  | Hazard Ratio                                                                                                                                              |
|                               |                                       |                                                                                                                                                                                                                                                                      | 0          |                        |         |             |  |  | 1 referent                                                                                                                                                |
|                               |                                       |                                                                                                                                                                                                                                                                      | 1          |                        |         |             |  |  | 1.47 (1.17–1.85)                                                                                                                                          |
|                               |                                       |                                                                                                                                                                                                                                                                      | 2          |                        |         |             |  |  | 2.49 (1.79–3.47)                                                                                                                                          |
|                               |                                       |                                                                                                                                                                                                                                                                      | <b>3–4</b> |                        |         |             |  |  | 3.18 (2.22–4.55)                                                                                                                                          |

|              |                                                                                                              |                                                                                                                                                                                                                                                                  |                     |                   |          |
|--------------|--------------------------------------------------------------------------------------------------------------|------------------------------------------------------------------------------------------------------------------------------------------------------------------------------------------------------------------------------------------------------------------|---------------------|-------------------|----------|
| Obi low gfr  | Obi et al, 2018                                                                                              | Cox proportional hazards based on<br>Age (categorized)<br>Race<br>Hispanic ethnicity<br>Cause of ESRD<br>Comorbidities<br>BMI<br>Last eGFR<br>Laboratory tests                                                                                                   | Score deciles       | Mortality         |          |
|              |                                                                                                              |                                                                                                                                                                                                                                                                  | < -1                | 4%                |          |
|              |                                                                                                              |                                                                                                                                                                                                                                                                  | > -1 to -0.687      | 7.3%              |          |
|              |                                                                                                              |                                                                                                                                                                                                                                                                  | > -0.687 to -0.449  | 9.7%              |          |
|              |                                                                                                              |                                                                                                                                                                                                                                                                  | > -0.449 to -0.231  | 12.2%             |          |
|              |                                                                                                              |                                                                                                                                                                                                                                                                  | > -0.231 to -0.0144 | 14.7%             |          |
|              |                                                                                                              |                                                                                                                                                                                                                                                                  | > -0.0144 to 0.201  | 18.0%             |          |
|              |                                                                                                              |                                                                                                                                                                                                                                                                  | > 0.201 to 0.436    | 22.2%             |          |
|              |                                                                                                              |                                                                                                                                                                                                                                                                  | > 0.436 to 0.686    | 26.8%             |          |
|              |                                                                                                              |                                                                                                                                                                                                                                                                  | > 0.686 to 1.02     | 34.7%             |          |
| Obi high gfr | Obi et al, 2018                                                                                              | Same as above but different weights and comorbidities.                                                                                                                                                                                                           | Score deciles       | Mortality         |          |
|              |                                                                                                              |                                                                                                                                                                                                                                                                  | ≤ -0.863            | 13.1%             |          |
|              |                                                                                                              |                                                                                                                                                                                                                                                                  | > -0.863 to -0.54   | 18.4%             |          |
|              |                                                                                                              |                                                                                                                                                                                                                                                                  | > -0.54 to -0.314   | 26.5%             |          |
|              |                                                                                                              |                                                                                                                                                                                                                                                                  | > -0.314 to -0.133  | 31.1%             |          |
|              |                                                                                                              |                                                                                                                                                                                                                                                                  | > -0.133 to 0.0393  | 35.3%             |          |
|              |                                                                                                              |                                                                                                                                                                                                                                                                  | > 0.0393 to 0.201   | 40.1%             |          |
|              |                                                                                                              |                                                                                                                                                                                                                                                                  | > 0.201 to 0.364    | 46.0%             |          |
|              |                                                                                                              |                                                                                                                                                                                                                                                                  | > 0.364 to 0.534    | 51.5%             |          |
|              |                                                                                                              |                                                                                                                                                                                                                                                                  | > 0.534 to 0.798    | 59.8%             |          |
| REIN score   | Couchoud, 2010<br>Otero-Lopez et al, 2012<br>Cheung et al, 2014<br>Thamer et al, 2015<br>Peeters et al, 2016 | Points assigned based on the following:<br>2 - BMI < 18.5 kg/m <sup>2</sup><br>1 - Diabetes<br>2 - CHF<br>1 - Dysrhythmia<br>2 - Severe PVD<br>1 - Active malignancy<br>2 - Severe behavioral disorder<br>3 - Dependence for transfers<br>2 - Unplanned dialysis | Score               | 6 month Mortality |          |
|              |                                                                                                              |                                                                                                                                                                                                                                                                  | 0-1                 | 8%                |          |
|              |                                                                                                              |                                                                                                                                                                                                                                                                  | 2                   | 14%               |          |
|              |                                                                                                              |                                                                                                                                                                                                                                                                  | 3-4                 | 26%               |          |
|              |                                                                                                              |                                                                                                                                                                                                                                                                  | 5-6                 | 35%               |          |
|              |                                                                                                              |                                                                                                                                                                                                                                                                  | 7-8                 | 51%               |          |
|              |                                                                                                              |                                                                                                                                                                                                                                                                  | Score               | 3 month           | 12 month |
|              |                                                                                                              |                                                                                                                                                                                                                                                                  | ≤ 4                 | 3%                | [65]     |
|              |                                                                                                              |                                                                                                                                                                                                                                                                  | 5-6                 | 9%                | 9%       |
|              |                                                                                                              |                                                                                                                                                                                                                                                                  | 7-8                 | 15%               | 26%      |
| ≥ 9          | 25%                                                                                                          | 34%                                                                                                                                                                                                                                                              |                     |                   |          |
|              |                                                                                                              | 53%                                                                                                                                                                                                                                                              |                     |                   |          |

|                         |                                              |                                                                                                                                                                                                                                                                                                                                                                                                                               | Score                        | 67-74 y | 75-84 y                                    | ≥85 y                                                    |
|-------------------------|----------------------------------------------|-------------------------------------------------------------------------------------------------------------------------------------------------------------------------------------------------------------------------------------------------------------------------------------------------------------------------------------------------------------------------------------------------------------------------------|------------------------------|---------|--------------------------------------------|----------------------------------------------------------|
|                         |                                              |                                                                                                                                                                                                                                                                                                                                                                                                                               | 0-3                          | 8.3%    | 13.0%                                      | 19.1%                                                    |
|                         |                                              |                                                                                                                                                                                                                                                                                                                                                                                                                               | 4-5                          | 13.9%   | 20.3%                                      | 30.5%                                                    |
|                         |                                              |                                                                                                                                                                                                                                                                                                                                                                                                                               | 6-7                          | 19.8%   | 26.4%                                      | 34.8%                                                    |
|                         |                                              |                                                                                                                                                                                                                                                                                                                                                                                                                               | ≥8                           | 29.1%   | 36.1%                                      | 44.2%                                                    |
| SF-36 PCS and SF-36 MCS | Lopez Revuelta, 2004                         | Survey Instrument:<br><a href="https://www.rand.org/health/surveys_tools/mos/36-item-short-form/survey-instrument.html">https://www.rand.org/health/surveys_tools/mos/36-item-short-form/survey-instrument.html</a><br>Instructions for scoring:<br><a href="https://www.rand.org/health/surveys_tools/mos/36-item-short-form/scoring.html">https://www.rand.org/health/surveys_tools/mos/36-item-short-form/scoring.html</a> |                              |         |                                            |                                                          |
| Updated REIN score      | Couchoud et al, 2015                         | Points assigned based on the following:<br>1 - Male<br>2 - Age 85-90 years<br>3 - Age >90 years<br>2 - CHF stage I-II<br>4 - CHF stage II-IV<br>1 - PVD stage III-IV<br>1 - dysrhythmia<br>2 - cancer<br>2 - severe behavioral disorder<br>4 - need assistance to transfer<br>9 - totally dependent to transfer<br>5 - albuminemia <25<br>3 - albuminemia 25-30<br>2 - albuminemia 30-35                                      | Score<br><12<br>12-16<br>≥17 |         | 3 month mortality<br><20<br>20-40%<br>≥40% |                                                          |
| RMRC                    | Mauri et al, 2008<br>Otero-Lopez et al, 2012 | Logistic regression model based on :<br>Age<br>Sex<br>Primary renal disease<br>Functional autonomy degree<br>Cardiovascular disease<br>COPD<br>Malignant processes<br>Chronic liver disease<br>Malnutrition<br>Vascular access type                                                                                                                                                                                           |                              |         |                                            | Score cutoffs not defined. Presented as deciles of risk. |

|                        |                    |                                                               |                                                                                   |           |         |
|------------------------|--------------------|---------------------------------------------------------------|-----------------------------------------------------------------------------------|-----------|---------|
| Rule based model       | Geddes et al, 2006 | Computerized algorithm                                        | <b>Not reported</b>                                                               |           |         |
| Thamer – simple        | Thamer et al, 2015 | Points assigned based on the following:                       | Score                                                                             | mortality |         |
|                        |                    | 0 - Age < 70                                                  |                                                                                   | 3 month   | 6 month |
|                        |                    | 1 - Age 70-84                                                 |                                                                                   |           |         |
|                        |                    | 2 - Age 85-89                                                 | 0                                                                                 | 2%        | 4%      |
|                        |                    | 3 - Age ≥ 90                                                  | 2                                                                                 | 3%        | 7%      |
|                        |                    | 1 - Albumin < 3.5 g/dL                                        | 3                                                                                 | 12%       | 20%     |
|                        |                    | 1 - Needs assistance in daily living                          | 4                                                                                 | 17%       | 27%     |
|                        |                    | 1 - Lives in nursing home                                     | 5                                                                                 | 22%       | 35%     |
|                        |                    | 1 - Cancer or history of cancer                               | 6                                                                                 | 28%       | 44%     |
|                        |                    | 1 - CHF                                                       | 7                                                                                 | 34%       | 49%     |
|                        |                    | 1 - Hospitalized more than once or > 1 month in the last year | ≥8                                                                                | 39%       | 55%     |
| Thamer – comprehensive | Thamer et al, 2015 | Cox proportional hazards based on [52]                        | Detail not provided risk deciles with mortality 2% to just shy of 30% in Figure 2 |           |         |
|                        |                    | Age                                                           |                                                                                   |           |         |
|                        |                    | Sex                                                           |                                                                                   |           |         |
|                        |                    | Race                                                          |                                                                                   |           |         |
|                        |                    | Catheter use                                                  |                                                                                   |           |         |
|                        |                    | No or late nephrology referral                                |                                                                                   |           |         |
|                        |                    | Albumin                                                       |                                                                                   |           |         |
|                        |                    | Creatinine                                                    |                                                                                   |           |         |
|                        |                    | Needs assistance in daily living or walking                   |                                                                                   |           |         |
|                        |                    | Living in Nursing home                                        |                                                                                   |           |         |
|                        |                    | Cancer                                                        |                                                                                   |           |         |
|                        |                    | Peripheral vascular disease                                   |                                                                                   |           |         |
|                        |                    | Alcohol problem                                               |                                                                                   |           |         |
|                        |                    | CHF                                                           |                                                                                   |           |         |
|                        |                    | No of hospitalizations in previous 6 months                   |                                                                                   |           |         |

|           |                                         |                                                                                                                                                                                                                                                                                                                                                                  |                                                                                                                                                                                                           |
|-----------|-----------------------------------------|------------------------------------------------------------------------------------------------------------------------------------------------------------------------------------------------------------------------------------------------------------------------------------------------------------------------------------------------------------------|-----------------------------------------------------------------------------------------------------------------------------------------------------------------------------------------------------------|
| Van Manen | Van Manen et al 2002                    | Cox proportional hazards based on<br>Age (categorized)<br>DM (years insulin dependent vs not)<br>Renal vascular disease<br>Malignancies (previous, current)<br>Liver Cirrhosis<br>COPD<br>Stroke<br>Myocardial infarction<br>Angina (severity rated)<br>CHF (severity rated)<br>Other heart diseases<br>Peripheral Vascular Disease<br>Systemic collagen disease | Score cutoffs not provided                                                                                                                                                                                |
| Wagner    | Thamer et al, 2015<br>Ivory et al, 2017 | Cox proportional hazards based on [27]<br>Age<br>Gender<br>Treatment modality<br>Race<br>Cause of ESRD<br>DM<br>CVD<br>Smoking<br>Hemoglobin<br>Albumin<br>Creatinine<br>Calcium                                                                                                                                                                                 | Score cutoffs not provided<br><br>Score                    3mo-3yr risk<br>Low                        7%<br>Intermediate            20%<br>High                       34%<br>Very High                59% |
| Wick      | Wick et al, 2017                        | 0 - Age < 79<br>2 - Age 80+<br>0 - eGFR 0-9.9<br>1 - eGFR 10-14.9<br>3 - eGFR 15+<br>2 - Atrial Fibrillation<br>2 - CHF<br>5 - Lymphoma<br>3 - Metastatic Cancer<br>2 - Hospitalized in the last 6 months                                                                                                                                                        | Score                    6 month mortality<br><5                        <25%<br>>12                      >50%ss                                                                                           |

1  
2  
3

1  
2



# 1 Supplemental Figure 1. Meta-Analysis by validation status

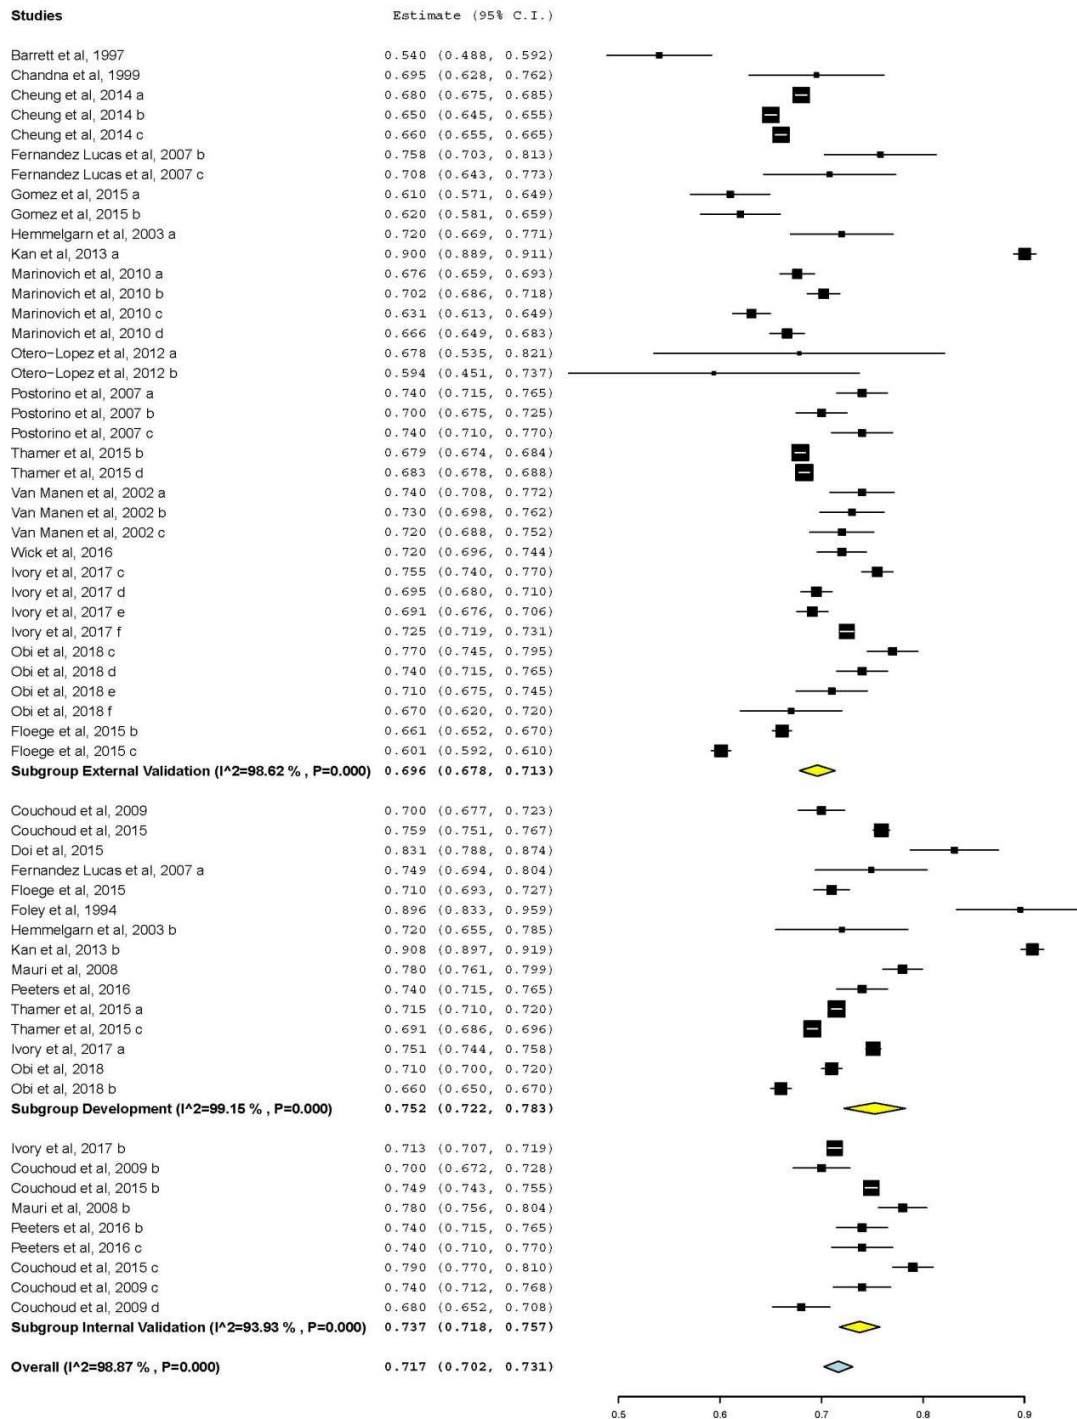

# 1 Supplemental Figure 8. Meta-Analysis by Cohort Size

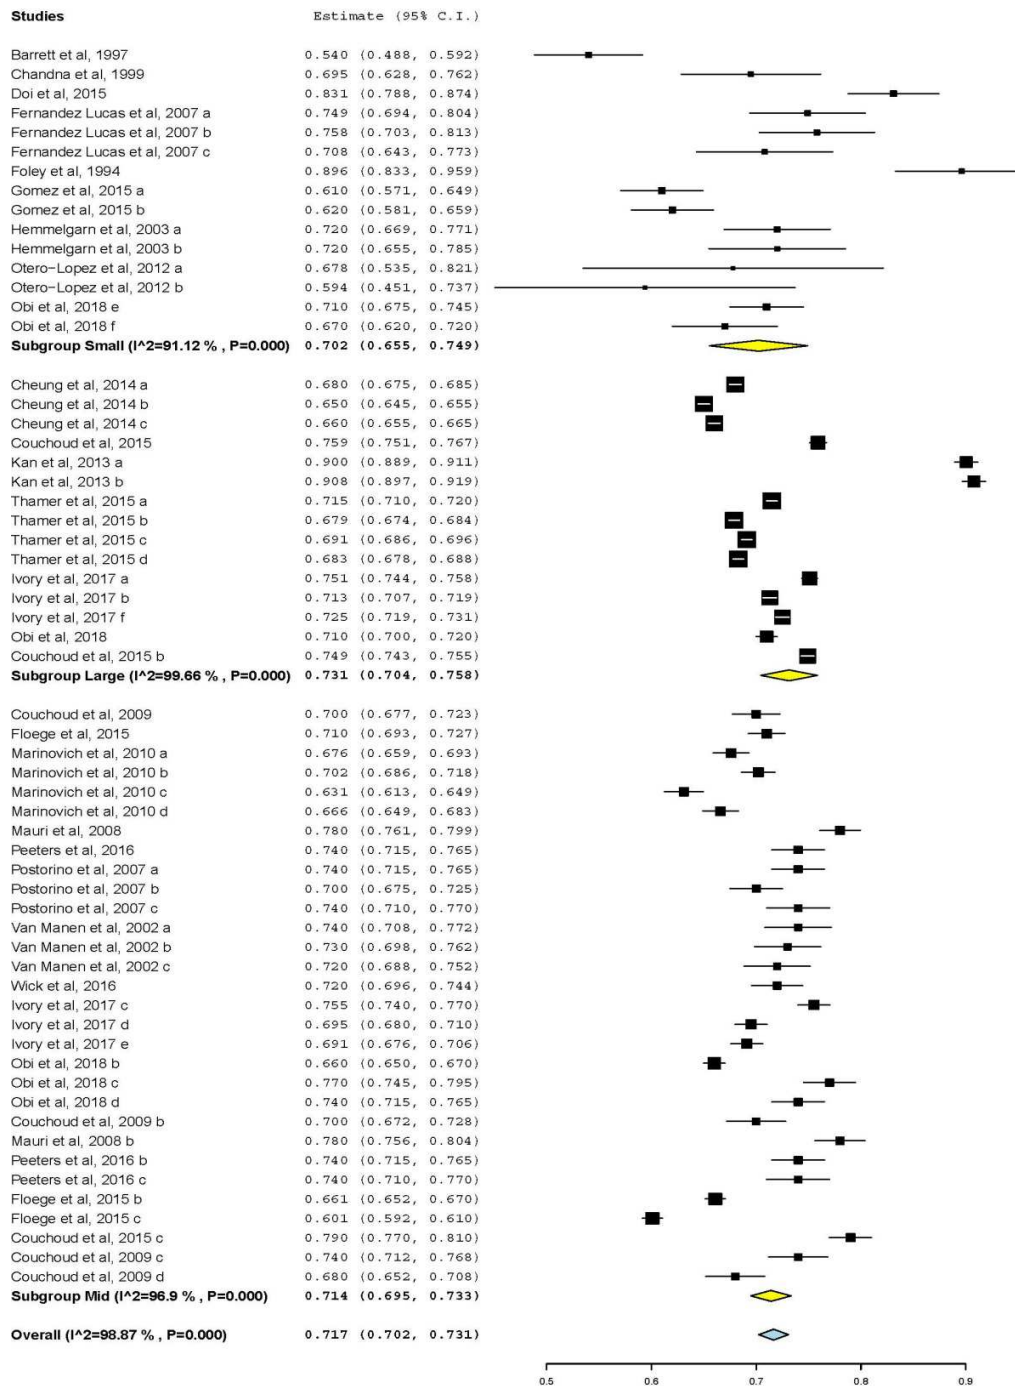

1 **Supplemental Figure 9. Meta-Analysis for cohorts >75 mean age**

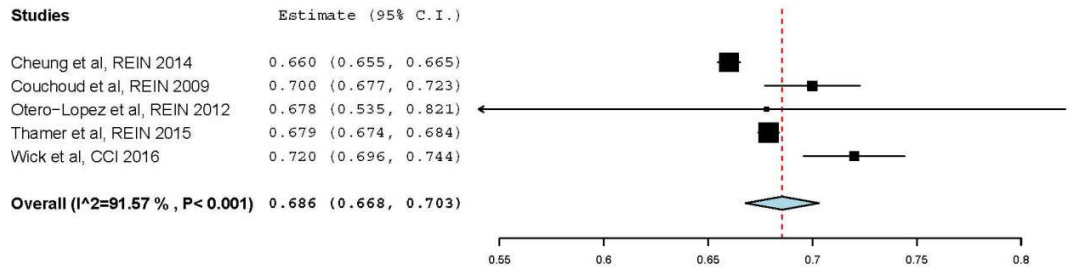

2
